# Supplementary material for: A Taxonomic Review of the Genus Telsimia Casey (Coleoptera, Coccinellidae) from China, with Descriptions of Eight New Species
Source: Insects. 2022 Sep 24;13(10):869. doi: 10.3390/insects13100869 (PMC9604187; doi:10.3390/insects13100869)
Supplement: Supplementary file 1 [file insects-13-00869-s001.zip › Table S1-List of Telsimia species around the world before this study.xlsx]

## Sheet: Telsimia species
Table S1. List of Telsimia species in the world before this study
Species	Type locality	China's first record
Telsimia inornate Casey, 1899	Africa-Liberia (Mount Coffee)
Telsimia striata Fürsch, 1997	Africa-Rwanda (Cyamudongo)
Telsimia tetrasticta Casey, 1899	Africa-South Africa (Wellington)
Telsimia emarginata Chapin, 1926	Asia-China (Fujian)	Chapin, 1926
Telsimia huiliensis Pang et Mao, 1979	Asia-China (Sichuan)	Pang et Mao, 1979
Telsimia jinyangiensis Pang et Mao, 1979	Asia-China (Sichuan)	Pang et Mao, 1979
Telsimia nigra centralis Pang et Mao, 1979	Asia-China (Sichuan)	Pang et Mao, 1979
Telsimia sichuanensis Pang et Mao, 1979	Asia-China (Sichuan)	Pang et Mao, 1979
Telsimia scymnoides Miyatake, 1978	Asia-China (Taiwan)	Miyatake, 1978
Telsimia shirozui Miyatake, 1965	Asia-China (Taiwan)	Miyatake, 1965
Telsimta bangalorensis Kapur, 1969	Asia-India (Karnataka, Bangaluru)
Telsimia flavomaculata Poorani, 2003	Asia-India (Karnataka, Padangadi)
Telsimia humidiphila Kapur, 1969	Asia-India (Meghalaya, Cherrapunji)	Peng, 2002-Hainan
Telsimia bicolor Kapur, 1969	Asia-India (Nicobar Islands)
Telsimia postocula Kapur, 1967	Asia-India (South Andaman)
Telsimia darjeelingensis Kapur, 1969	Asia-India (West Bangal, Darjeeling)
Telsimia rotundata (Mutschulsky, 1859)	Asia-India or Ceylan
Telsimia martis (Mulsant, 1853)	Asia-India Orientali
Telsimia nagasakiensis Miyatake, 1978	Asia-Japan (Nagasaki)	Yu, 1995-Taiwan
Telsimia nigra Weise, 1879	Asia-Japan (Nagasaki)
Telsimia chujoi Miyatake, 1959	Asia-Japan (Okinawa)	Yang, 1972-Taiwan
Telsimia ceylonica (Weise, 1900)	Asia-Sri Lanka (Bandarawela)
Telsimia kuznetsovi Hoang, 1987	Asia-Vietnam (Cam Ranh)
Telsimia daclacensis Hoang, 1983	Asia-Vietnam (Dak Lak)
Telsimia elongate Hoang, 1985	Asia-Vietnam (Kon Tum)
Telsimia tamdaoensis Hoang, 1981	Asia-Vietnam (Vinh Phuc)
Telsimia abdita Ślipiński, Pang and Pope, 2005	Oceania-Australia (New South Wales)
Telsimia acaciae Ślipiński, Pang and Pope, 2005	Oceania-Australia (Queensland)
Telsimia cassicula Ślipiński, Pang and Pope, 2005	Oceania-Australia (Queensland)
Telsimia crebra (Blackburn, 1895)	Oceania-Australia (Queensland)
Telsimia gibbosa (Blackburn, 1895)	Oceania-Australia (Queensland)
Telsimia glorious Ślipiński, Pang and Pope, 2005	Oceania-Australia (Queensland)
Telsimia leucoceps Ślipiński, Pang and Pope, 2005	Oceania-Australia (Queensland)
Telsimia obscuripes (Lea, 1902)	Oceania-Australia (Queensland)
Telsimia rossi Ślipiński, Pang and Pope, 2005	Oceania-Australia (Queensland)
Telsimia rotunda Ślipiński, Pang and Pope, 2005	Oceania-Australia (Queensland)
Telsimia subviridis (Blackburn, 1892)	Oceania-Australia (Queensland)
Telsimia angulata (Blackburn, 1889)	Oceania-Australia (South Australia)
Telsimia occidua Ślipiński, Pang and Pope, 2005	Oceania-Australia (Western Australia)
Telsimia palitans Ślipiński, Pang and Pope, 2005	Oceania-Australia (Western Australia)
Telsimia nitida Chapin, 1926	Oceania-Micronesia (Guam)
Telsimia ephippiger Chapin 1965	Oceania-Micronesia (Palau)
Telsimia megalops Chapin 1965	Oceania-Micronesia (Palau)
Telsimia yapensis Chapin, 1965	Oceania-Micronesia (Yap)
Telsimia nitida gemmosa Chazeau, 1984	Oceania-New Guinea (Bubia)
Telsimia elainae Chazeau, 1984	Oceania-New Guinea (Laloki)
Telsimia longanimis Chazeau, 1984	Oceania-New Guinea (Laloki)
Telsimia ismayi Chazeau, 1984	Oceania-New Guinea (Rabaul)
