# Supplementary figures and images for: A Taxonomic Review of the Genus Telsimia Casey (Coleoptera, Coccinellidae) from China, with Descriptions of Eight New Species
Source: MDPI journal article supplement (doi:10.3390/insects13100869), 2022-09-24

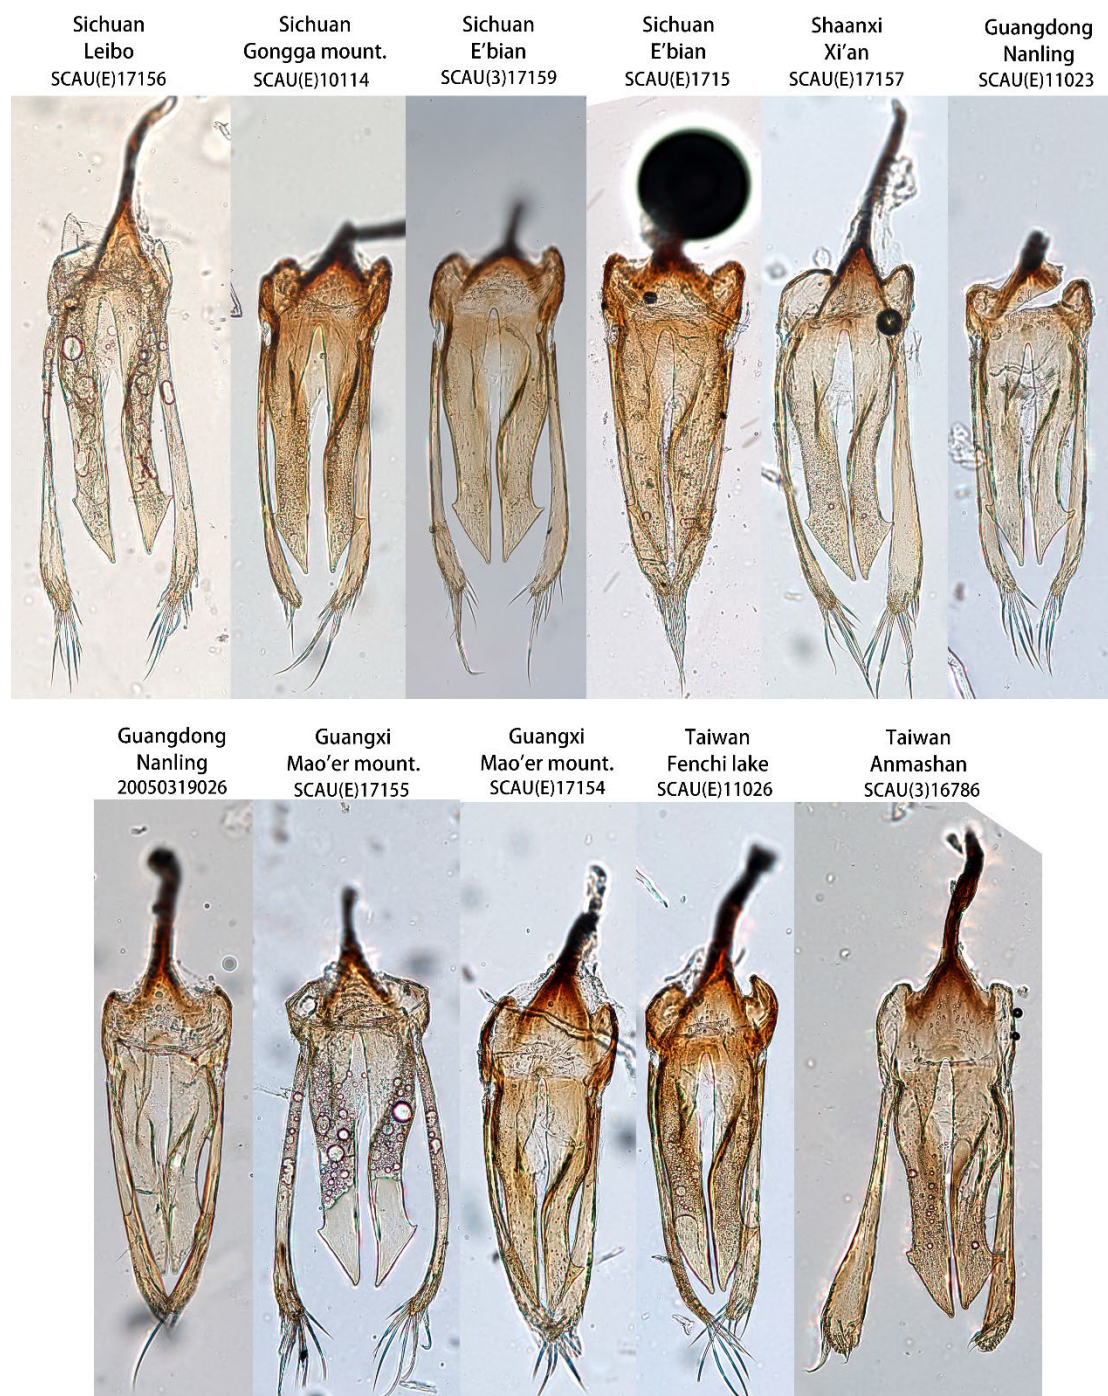

Figure S1. The tegmen of *Telsimia nigra* from different places in China

Supplement: s1 [file s1]
